1 ***Pseudomonas aeruginosa* C-terminal processing protease CtpA assembles into a**  
2 **hexameric structure that requires activation by a spiral-shaped lipoprotein**  
3 **binding partner**

4  
5 Hao-Chi Hsu<sup>a</sup>, Michelle Wang<sup>b</sup>, Amanda Kovach<sup>a</sup>, Andrew J. Darwin<sup>b,#</sup>, Huilin Li<sup>a,#</sup>

6  
7  
8 <sup>a</sup>Department of Structural Biology, Van Andel Institute, Grand Rapids, Michigan, USA

9 <sup>b</sup>Department of Microbiology, New York University Grossman School of Medicine, New  
10 York, New York, USA

11

12

13 Running head: Structural analysis of the CtpA-LbcA system

14

15

16

17 # Address correspondence to Andrew J. Darwin, [andrew.darwin@med.nyu.edu](mailto:andrew.darwin@med.nyu.edu) or Huilin

18 Li, [Huilin.Li@vai.org](mailto:Huilin.Li@vai.org)

19

20

21

22 Abstract: 172

23 Text: 4,994 (excluding Abstract, Importance, References, Tables and Figure legends)

24 **ABSTRACT**

25 *Pseudomonas aeruginosa* CtpA is a carboxyl terminal-processing protease that  
26 partners with the outer membrane lipoprotein LbcA to degrade at least five cell wall-  
27 associated proteins, four of which are cell wall hydrolases. This activity plays an  
28 important role in supporting *P. aeruginosa* virulence in a mouse model of acute  
29 pneumonia. However, almost nothing is known about the molecular mechanisms  
30 underlying CtpA and LbcA function. Here, we used structural analysis to show that CtpA  
31 alone assembles into an inactive hexamer comprising a trimer of dimers, which limits its  
32 substrate access and prevents nonspecific degradation. The adaptor protein LbcA is a  
33 right-handed open spiral with 11 tetratricopeptide repeats, which might wrap around a  
34 substrate to deliver it to CtpA for degradation. By structure-guided mutagenesis and  
35 functional assays, we also showed that the interfaces of the CtpA trimer-of-dimers, and  
36 an N-terminal helix of LbcA, are important for LbcA-mediated substrate degradation by  
37 CtpA both *in vitro* and *in vivo*. This work improves our understanding of the molecular  
38 mechanism of a CTP within the C-terminal processing peptidase-3 group.

39 **IMPORTANCE**

40 Carboxyl-terminal processing proteases (CTPs) are found in all three domains of life. In  
41 bacteria, some CTPs have been associated with virulence, raising the possibility that  
42 they could be therapeutic targets. However, relatively little is known about their molecular  
43 mechanisms of action. In *Pseudomonas aeruginosa*, CtpA supports virulence by  
44 working in complex with the outer membrane lipoprotein LbcA to degrade cell wall  
45 hydrolases. Here, we report structure-function analyses of CtpA and LbcA, which  
46 reveals that CtpA assembles into an inactive hexamer comprising a trimer of dimers.  
47 LbcA is monomeric, with an N-terminal region important for binding to and activating  
48 CtpA, followed by a spiral structure composed of 11 tetratricopeptide repeats, which  
49 could wrap around a substrate for delivery to CtpA. This work provides the first structure  
50 of a CTP-3 group member, revealing a unique multimeric arrangement and insight into  
51 how this important proteolytic system functions.

52

## 53 INTRODUCTION

54 A eubacterial cell is protected by a mesh-like cell wall of peptidoglycan (PG), which is  
55 composed of linear glycan strands with peptide side chains that cross-link to each other  
56 through peptide bonds (1). To accommodate growth, these cross-links must be cleaved  
57 so that nascent PGs can be inserted into the network (1-3). Several PG endopeptidases  
58 carry out this hydrolysis, including MepS, MepM, and MepH in *Escherichia coli* (4, 5).  
59 However, if not tightly regulated, their activity could lead to rupture of the PG sacculus  
60 and cell death. One way to control endopeptidase activity is through the relatively  
61 recently discovered carboxyl-terminal processing (CTP) protease system. CTPs belong  
62 to the S41 family of serine proteases (6). All CTPs have a PDZ domain — named  
63 because it was first noted in: postsynaptic density protein of 95 kDa, *Drosophila* disc  
64 large tumor suppressor, and zonula occludens-1 protein — which plays roles in  
65 substrate recognition and protease regulation (7, 8). CTPs work within the cell envelope  
66 of Gram-negative and Gram-positive bacteria and have been linked to virulence (9-14).

67 The *E. coli* CTP Prc partners with the lipoprotein Nlpl to cleave the PG  
68 endopeptidase MepS (5). Prc is a bowl-shaped monomer, and the Nlpl adaptor forms a  
69 homodimer that binds to two separate molecules of Prc (15). In *Bacillus subtilis*, the  
70 CtpB protease processes and activates the intramembrane protease 4FA-4FB complex,  
71 thereby regulating spore formation (16, 17). CtpB has N-terminal and C-terminal  
72 dimerization domains, plus a cap domain preceding the protease core domain.  
73 Structural analysis revealed that CtpB assembles a dimeric self-compartmentalizing ring  
74 structure (18). The substrate peptide enters the proteolytic site via a narrow tunnel that  
75 is largely sequestered by the PDZ domain and becomes exposed only in the presence

76 of a substrate. Therefore, the CtpB protease is reversibly activated by the substrate C-  
77 terminal peptide. In contrast to Prc and CtpB, *P. aeruginosa* CtpA has been assigned to  
78 the C-terminal processing peptidase-3 group (19). No structural studies have been  
79 reported so far for this group.

80 *Pseudomonas aeruginosa* is an opportunistic human pathogen. It is one of the  
81 leading causes of sepsis in intensive care units, and outbreaks of multidrug-resistant  
82 strains have been reported in hospitals (20-22). In contrast to *E. coli*, in which the only  
83 CTP present is Prc, *P. aeruginosa* has both the C-terminal processing peptidase-1  
84 group member Prc, and the C-terminal processing peptidase-3 group member CtpA (10,  
85 19). We reported previously that CtpA is required for normal function of the type 3  
86 secretion system and for virulence in a mouse model of acute pneumonia (10). *P.*  
87 *aeruginosa* CtpA has 39% amino acid sequence identity with *B. subtilis* CtpB, which  
88 suggests that they might share a similar fold. However, CtpA has a much longer C-  
89 terminal region. This extended C-terminus might alter the oligomerization mode relative  
90 to that of CtpB (18). However, it is not known if or how CtpA assembles into a self-  
91 compartmentalizing structure to prevent nonspecific proteolysis. Unlike CtpB, CtpA is  
92 not directly activated by a protein substrate. Instead, it requires the adaptor protein  
93 LbcA, the lipoprotein binding partner of CtpA, for activity *in vivo* and *in vitro* (23).

94 LbcA is predicted to be an outer membrane lipoprotein, and to contain 11  
95 tetratricopeptide repeats (TPRs). The TPR motif is a degenerate 34-amino-acid  
96 sequence that mediates protein-protein interactions (24-26). LbcA promotes CtpA  
97 protease activity, and *ctpA* and *lbcA* null mutants share common phenotypes, such as a  
98 defective type 3 secretion system and accelerated surface attachment (10, 23, 27). Five

99 LbcA-CtpA substrates have been reported to date, and four of them are predicted to be  
100 PG cross-link hydrolases: the LytM/M23 family peptidases MepM and PA4404, and the  
101 NlpC/P60 family peptidases PA1198 and PA1199 (23, 27). Therefore, it appears that  
102 LbcA interacts with CtpA to assemble an active proteolytic complex, which controls the  
103 activity of these enzymes by degrading them. However, the molecular mechanisms  
104 underlying CtpA and LbcA function are unknown. Here, we describe structural and  
105 functional analyses of CtpA and LbcA. We show that CtpA alone assembles as an  
106 inactive trimer of dimers and that LbcA is a right-handed spiral that might wrap around a  
107 substrate protein. Structure-guided mutagenesis confirms the functional importance of  
108 CtpA interfaces and identifies the interface between CtpA and LbcA.  
109

## 110 RESULTS

111 **CtpA assembles a trimer-of-dimers hexamer in solution.** CtpA is located in the  
112 periplasm, tethered to the outer membrane via its interaction with LbcA (23). Its N-  
113 terminal 23 residues are a type I signal sequence, which is followed by a 14-residue  
114 region that is enriched in alanine, glycine, and proline that contributes to a bacterial low  
115 complexity region and is predicted to be disordered (28). Therefore, we removed these  
116 37 amino acids to produce a truncated CtpA protein for structural and functional studies  
117 (Supplemental Table 1, Fig. 1a). For simplicity, we refer to this  $\Delta$ N37 construct as CtpA  
118 throughout the main text. The CtpA crystals diffracted X-rays to 3.5-Å resolution. We  
119 first used molecular replacement with the *B. subtilis* CtpB as a search model to solve  
120 the CtpA structure, but this did not lead to a satisfactory solution. We then produced  
121 selenomethionine-substituted CtpA crystals for SAD-based phasing. The derivatized  
122 crystals diffracted to 3.3 Å, leading to successful structural solution (Supplemental Table  
123 2). CtpA formed a hexamer that comprised a trimer of dimers (Fig. 1b). This oligomer  
124 state is consistent with an estimated mass of a hexamer from the gel filtration profile  
125 (Fig. 1c). As expected, each CtpA protomer consists of an N-terminal dimerization  
126 region (NDR), a PDZ domain, a cap domain, a protease core domain, and a C-terminal  
127 dimerization region (CDR) (Fig. 1d). The PDZ domain is partially disordered, but we  
128 were able to generate a homolog PDZ model based on the CtpB structure and  
129 accurately docked the domain guided by two anomalous density peaks from  
130 selenomethionine residues 153 and 160 of the domain (Supplemental Figure 1). The  
131 loop connecting S10 and H6 (aa's 378–411) within the CDR was disordered, and the  
132 last two residues (435-436) were not resolved.

133           **The CtpA hexamer alone in the absence of LbcA is in an inactive**  
134 **configuration.** The CtpA core region contains the protease active site. There is a  
135 narrow tunnel dividing the core domain into the upper cap and lower body regions (Fig.  
136 1d). In CtpB this tunnel was suggested to guide the substrate peptide into the proteolytic  
137 site (18). The cap of CtpA is a four-stranded  $\beta$ -sheet (S4, S5, S8, S9) located below the  
138 NDR. The body region is composed of a three-helix bundle (H3, H4, H5) and a five-  
139 stranded  $\beta$ -sheet (S1, S2, S3, S6, S7). The CtpA catalytic Ser-302 is located at the end  
140 of the narrow tunnel between the cap and the body region.

141           The CtpA hexamer is in an inactive conformation. The PDZ domain is in a  
142 position that blocks the narrow substrate peptide tunnel leading to Ser-302. Furthermore,  
143 the catalytic triad Ser-302–Lys-327–Gln-331 is well beyond hydrogen-bonding distance:  
144 Ser-302 and Lys-327 are 4.2 Å apart and Lys-327 and Gln-331 are 9.1 Å apart (Fig. 1e).  
145 We solved the crystal structure of CtpA that was catalytically inactive due to an S302A  
146 substitution and found that it was also in the inactive configuration (Supplemental Figure  
147 2). For comparison, the catalytic triad Ser-309–Lys-334–Gln-338 in the protease-active  
148 *B. subtilis* CtpB are all within hydrogen-bonding distance (Fig. 1e). By superimposing  
149 the two proteases, we found that transition to the active form requires the CtpA cap  
150 domain to clamp down toward the catalytic site by 11 Å and also a large-scale  
151 movement of the associated PDZ domain by 12 Å (Fig. 1f, Supplemental Video 1). The  
152 CtpA structure is consistent with our previous observation that purified wild-type CtpA  
153 alone was inactive in degrading its substrates (23). The addition of purified LbcA was  
154 able to activate the protease of wild-type CtpA but not of the mutant CtpA(S302A).  
155 Therefore, unlike CtpB, which fluctuates between an active and inactive form in solution



156 and can be activated by a protein substrate (18), the CtpA hexamer is locked in an  
157 inactive configuration and requires LbcA for activation (23).

158 **The C-terminal dimerization interface is important for full CtpA activity.** *P.*

159 *aeruginosa* CtpA dimerizes via its NDR in the same way as *B. subtilis* CtpB (Fig. 2a).

160 However, the two CDRs of CtpA are far apart in this dimer, and six unhinged CDRs of  
161 three CtpA dimers interact to form the triangular trimer-of-dimer complex (Figs. 1b, 2a).

162 In contrast, CtpB forms a parallel homodimer by both head-to-head N-terminal and tail-  
163 to-tail C-terminal interactions (Fig. 2b) (18). The CtpA NDR is composed of the H1 and

164 H2 helices. The NDRs of two CtpA monomers form a domain-swapped, intermolecular  
165 4-helix bundle, in which the NDR of one protomer reaches over to contact the cap

166 domain of the other protomer (Fig. 2a, 2c). The four-helix bundle is at the vertex of the  
167 triangular complex. The NDR–NDR dimerization is driven by hydrophobic interactions.

168 Specifically, Leu-69, Ala-73, and Met-77 are at the intersecting point of the two crossed

169 H2's. Met-77 hydrophobically interacts with Ala-73 and Leu-69 of the second protomer  
170 (Fig. 2c). H1 of protomer 1 is nearly parallel to H2 of protomer 2, with the H1 residues

171 Leu-46, Phe-49, Val-52, Leu-53, and Val-56 hydrophobically interacting with the H2

172 residues Leu-70, Ile-74, Met-77, Leu-78, and Leu-81. The Leu-46 and Phe-49 of the two

173 H1's are also within the van der Waals distance. The hydrophobic NDR–NDR

174 interaction of the CtpA dimer resembles that in the CtpB dimer, consistent with the

175 conserved sequence in this region (Fig. 2e).

176 The C-terminal dimerization interface of CtpA involves the  $\beta$ -strand S10 and the

177 helix H6 (Fig. 2d). The two S10  $\beta$ -strands (Arg-370 to Glu-376) form an intermolecular,

178 antiparallel  $\beta$ -sheet that reinforces the dimer interface. The two H6's (Tyr-418 to Gly-435)

179 are orthogonal to each other but form a short leucine zipper in the middle section  
180 mediated by Leu-426 and Leu-430. The CtpA C-terminal dimer interface is not like that  
181 of CtpB, which dimerizes via interaction in a different region. Indeed, the C-terminal  
182 sequence of *P. aeruginosa* CtpA is not conserved in *B. subtilis* CtpB (Fig. 2e), which is  
183 consistent with their different oligomeric assembly. To investigate the functional  
184 importance of the unique C-terminal dimerization interface of CtpA, we constructed a  
185 mutant with a partially disrupted H6 helix by removing the last six residues Ser-431 to  
186 Asn-436; CtpA( $\Delta$ C6). We found that CtpA( $\Delta$ C6) eluted from a gel filtration column as a  
187 dimer (Fig. 3a), so the C-terminal truncation prevented CtpA hexamer formation.

188 We next asked whether the C-terminal dimerization interface, present in the  
189 intact CtpA hexamer but disrupted in the CtpA( $\Delta$ C6) dimer, is required for normal CtpA  
190 function. In an *in vitro* assay, we found that the CtpA( $\Delta$ C6) dimer was less active than  
191 the CtpA hexamer in degrading the model substrate PA1198, in reactions that also  
192 contained LbcA (compare lanes 3 and 4 in Fig. 3b).

193 To further investigate the functional significance of the leucine zipper in H6, we  
194 generated two CtpA double-mutant constructs with L426K/L430K and L426A/L430A  
195 substitutions that disrupted the leucine zipper interaction. The two purified mutant  
196 proteins were mainly dimeric and failed to assemble into a hexamer, based on their gel  
197 filtration profiles (Fig. 3a). Their LbcA-activated *in vitro* protease activity toward PA1198  
198 was lower relative to wild-type CtpA (Fig. 3b, compare lanes 5 and 6 to lane 3).  
199 However, like the CtpA( $\Delta$ C6) mutant, the leucine zipper mutants retained significant  
200 protease activity relative to the protease dead mutant CtpA(S302A) (Fig. 3b, compare  
201 lanes 5 and 6 with lane 2).

202 We extended our analysis by constructing plasmids encoding derivatives of full-  
203 length CtpA with the  $\Delta$ C6, L426K/L430K (LLKK), or L426A/L430A (LLAA) mutations.  
204 After introducing these plasmids into a *P. aeruginosa*  $\Delta$ ctpA mutant, immunoblot  
205 analysis showed that the steady-state levels of the mutant proteins were similar to the  
206 wild-type (Fig. 3c). Therefore, the mutations did not affect CtpA stability *in vivo*.  
207 However, PA1198 accumulated in the presence of these three mutants relative to the  
208 wild-type, although not as much as in the presence of CtpA(S302A) (Fig. 3c). This  
209 suggests that the protease activity of the three mutants was reduced, but not abolished,  
210 which is consistent with the *in vitro* analysis (Fig. 3b). Therefore, our studies suggest  
211 that the hexameric assembly is important for proper CtpA function.

212 **LbcA forms a spiral that could wrap around CtpA substrates.** During the  
213 maturation of the lipoprotein LbcA, its N-terminal 16 residues are removed, exposing  
214 Cys-17 (Fig. 4a). Then Cys-17 is lipidated so that the N-terminus can be anchored in  
215 the outer membrane from the periplasmic side (29-31). LbcA is able to bind to CtpA and  
216 its substrates independently (27). Therefore, to begin to understand how LbcA might be  
217 capable of these separate interactions, we tried to solve the LbcA crystal structure. We  
218 were able to crystallize LbcA with its N-terminal 48 residues removed ( $\Delta$ N48). The  
219 crystal structure was solved to 3.5-Å resolution by the SAD method with  
220 selenomethionine-derivatized LbcA( $\Delta$ N48) crystals (Fig. 4a-d). This structure contains  
221 only  $\alpha$ -helices and connecting loops, with a total of 29  $\alpha$ -helices. We resolved all 11  
222 predicted tetratricopeptide repeats, comprising 22  $\alpha$ -helices from helix-7 (H7) to H28.  
223 The sequences of the 34-residue TPRs are largely conserved (Fig. 4b). Gly/Ala at  
224 position 8 and Ala at positions 20 and 27 are most conserved in the TPR family,

225 although none of these are invariant. Interestingly, TPR1, TPR5, and TPR10 contain  
226 only 33 amino acids, but they all contain the signature residues Gly/Ala at position 8 and  
227 Ala at position 20, and TPR1 and TPR10 also contain a signature Leu at position 24.  
228 Within each TPR, the first helix (TPR-A) lines the inner surface and the second helix  
229 (TPR-B) lines the outer surface of the ring structure. Alignment of the 11 TPRs in  
230 LbcA( $\Delta$ N48) showed that more-conserved hydrophobic residues are concentrated in the  
231 TPR-A helix and more-conserved charged residues are distributed in TPR-B helix and  
232 in the turns connecting TPR-A and TPR-B, suggesting that the inner and the outer  
233 surfaces of the ring may have distinct functions.

234 The 11 TPRs form a notched ring, with an outer diameter of about 6 nm and an  
235 inner diameter of about 3 nm (Fig. 4c). It is a right-handed spiral structure, because the  
236 first TPR is slightly above, and the last TPR is below the ring. The first 4  $\alpha$ -helices at the  
237 N terminus form an elongated extension that partially caps the TPR ring. Helices H5  
238 and H6 serve as a hinge that links the N-terminal helical extension and the TPR spiral.  
239 However, the loop connecting H4 and H5 (aa's 163-171) has a high crystallographic B-  
240 factor (150-200  $\text{\AA}^2$ ) that is indicative of flexibility. Therefore, this loop and the H5-H6  
241 hinge are likely to allow relative motion of the NT helical extension with respect to the  
242 TPR spiral. The TPR ring is capped at the end by the single short  $\alpha$ -helix, H29.

243 LbcA( $\Delta$ N48) purified as a monomer in solution (Fig. 5a-b). However, four  
244 LbcA( $\Delta$ N48) molecules formed an interlocked tetramer as a dimer of dimers in the  
245 crystal (Fig. 5c-d). The chamber of the TPR spiral of the first LbcA is occupied by the  
246 H3-H4 of a second LbcA molecule on the top and by the H1-H2 of a third LbcA  
247 molecule on the side (Fig. 5d). Therefore, there is a 4-helix bundle inside the first LbcA

248 TPR spiral. We suggest that this bundle may mimic a substrate and that the LbcA spiral  
249 may wrap around a substrate to target it to CtpA for degradation (Fig. 5e). In this  
250 scenario, the conserved and hydrophobic residues of the TPR-A helices lining the inner  
251 surface of the TPR spiral may participate in binding that substrate.

252 **The LbcA H1 is essential for binding to and activating the CtpA protease.**

253 To identify the binding interface between CtpA and LbcA, we produced a series of N-  
254 and/or C-terminal-truncated LbcA mutants and did a CtpA pulldown assay (Fig. 6a). We  
255 found that removing the C-terminal five residues of LbcA did not affect the LbcA–CtpA  
256 interaction. All constructs containing the complete H1-H29 region pulled down CtpA.  
257 However, LbcA with either H1 truncation (His<sub>6</sub>-LbcA $\Delta$ N84) or H1-H4 truncation (His<sub>6</sub>-  
258 LbcA $\Delta$ N165) failed to pull down CtpA. This result suggests that the LbcA NT helical  
259 extension, in particular H1, is required for LbcA binding to CtpA, and that LbcA H1  
260 directly participates in the binding.

261 We then carried out both *in vitro* and *in vivo* assays to monitor degradation of the  
262 PA1198 substrate (23). We first incubated purified CtpA with separately purified LbcA  
263 proteins and PA1198. As expected, PA1198 was degraded in the presence of His<sub>6</sub>-  
264 LbcA $\Delta$ N48, which had the intact NT helical extension (Fig. 6b). However, PA1198 was  
265 not degraded in the presence of His<sub>6</sub>-LbcA( $\Delta$ N84) (missing H1) or His<sub>6</sub>-LbcA( $\Delta$ N165)  
266 (missing H1-H4). In fact, the outcomes of reactions with these two truncations were  
267 indistinguishable from those containing no LbcA, or those using the protease dead  
268 CtpA(S302) (Fig. 6b). In a  $\Delta$ *lbcA* mutant *P. aeruginosa* strain, plasmids encoding LbcA  
269 with in frame deletions equivalent to the  $\Delta$ N84 or  $\Delta$ N165 constructs failed to activate  
270 CtpA, as revealed by the accumulation of PA1198, which was present at a similar level

271 as in a strain without any LbcA (Fig. 6c). Therefore, both pulldowns and *in vitro* and *in*  
272 *vivo* activity assays pinpointed the LbcA H1 as a key binding element for activation of  
273 the CtpA protease.  
274

## 275 **DISCUSSION**

276 The LbcA–CtpA system supports the function of the *P. aeruginosa* type 3 secretion  
277 system, is required for virulence in a mouse model of acute infection, and affects  
278 surface attachment (10, 23). Furthermore, four CtpA substrates are PG cross-link  
279 hydrolases, which means that the LbcA–CtpA system affects the integrity of a crucial  
280 cell envelope component and perhaps the most important antibiotic target, the cell wall.  
281 Therefore, this system could be an effective antibiotic target, and the structural analysis  
282 reported here may aid the development of such antibiotics. Here, we have shown that  
283 CtpA assembles as a hexamer. However, the hexamer alone is inactive, because the  
284 catalytic triad Ser302–Lys327–Gln331 is not in hydrogen-bonding distance. We also  
285 found that the CtpA partner protein LbcA has an N-terminal helical region that is needed  
286 to bind to CtpA, and a large spiral cavity that has the capacity to wrap around a  
287 substrate for delivery to CtpA.

288         How the interaction with LbcA converts CtpA into an active protease is currently  
289 unclear. Elucidation of the activation mechanism requires the determination of the CtpA-  
290 LbcA complex. However, our previous experiments suggested that most, if not all, CtpA  
291 in the cell is bound to LbcA (23). CtpA fractionates with the membrane fraction in *lbcA*<sup>+</sup>  
292 cells, but is in the soluble periplasmic fraction in  $\Delta$ *lbcA* cells, and when CtpA or LbcA is  
293 purified from *P. aeruginosa*, they copurify with a lot of the other one (23). Also, the  
294 pulldown assays done here show that LbcA and CtpA can interact in the absence of  
295 substrate (Fig. 6a). Therefore, it is possible that the LbcA-CtpA complex fluctuates  
296 between inactive and active states, and perhaps the presence of a substrate would

297 stabilize the enzyme-adaptor-substrate in the active state for productive substrate  
298 hydrolase degradation.

299         The PDZ domain is the C-terminal peptide substrate-binding element of CTPs  
300 (32). The ability of PDZ domains to move in order to accommodate the incoming C-  
301 terminal substrate peptide partially accounts for the substrate delivery–based activation  
302 mechanism of the CTPs. The PDZ domain is the most flexible region in the CtpB  
303 structure and acts as an inhibitor by blocking the substrate peptide binding in the  
304 inactive form, but moves away to form a narrow tunnel for a substrate peptide in the  
305 active form (18). Similarly, the PDZ domain of CtpA is highly flexible and largely invisible  
306 in the crystal structure of the inactive CtpA hexamer, suggesting a CtpA activation  
307 mechanism similar to that of CtpB. In the case of Prc from *E. coli*, the PDZ domain acts  
308 as an activator rather than an inhibitor, but its movement is still a key feature of the  
309 activation mechanism (8).

310         *P. aeruginosa* CtpA requires the partner lipoprotein LbcA for activation and  
311 targeted proteolysis (23). This is a variation in the general substrate activation  
312 mechanism. In this regard, the LbcA–CtpA system is analogous to the *E. coli* Nlpl–Prc  
313 system, in which the TPR-containing adaptor Nlpl plays the dual function of delivering  
314 the PG hydrolase MepS to the Prc protease for degradation, and activating the protease  
315 (8, 15). Despite this functional similarity, significant differences exist between these two  
316 systems. The two proteases are in different C-terminal processing peptidase families; *E.*  
317 *coli* Prc is much larger than *P. aeruginosa* CtpA; and Prc functions as a monomer, not a  
318 hexamer. Therefore, the Prc N-terminal and C-terminal helical domains are not involved  
319 in oligomerization; instead, they wrap around the protease core, perhaps to limit



320 substrate access to the protease. Nlpl has a total of 14 helices with four TPRs,  
321 compared with the 29 helices and 11 TPRs of LbcA. Although Nlpl and LbcA both  
322 contain TPRs, the primary sequences of the proteins are not similar. Finally, Nlpl  
323 functions as a dimer, unlike the monomeric state of LbcA.

324         The LbcA–CtpA system contributes to the virulence of *P. aeruginosa*. This makes  
325 understanding the structure and function of this proteolytic system broadly significant.  
326 Future challenges include understanding exactly how LbcA activates CtpA, and how  
327 protein substrates, not just peptides, are specifically recognized by the multitude of  
328 CTPs and/or their adaptor proteins for tightly regulated proteolysis.  
329

## 330 MATERIALS AND METHODS

331 **Purification of CtpA.** DNA encoding amino acid 38 to the C-terminus of CtpA  
332 was subcloned into plasmid pET15b between the NdeI and XhoI sites. The plasmid  
333 encoded N-terminal His<sub>6</sub>-tagged CtpA( $\Delta$ N37). Similar plasmids encoding CtpA( $\Delta$ C6),  
334 CtpA-L426K L430K or CtpA-L426A L430A were constructed using reverse primers that  
335 incorporated the C-terminal mutations. *E. coli* BL21(DE3) transformants were grown at  
336 37°C to OD<sub>600</sub> = 0.6-0.7 before being induced with 0.5 mM IPTG and incubated at 16°C  
337 overnight. Cells were harvested by centrifugation and lysed by passing through a  
338 microfluidizer cell disruptor in 10 mM potassium phosphate, pH 8.0, 10 mM imidazole,  
339 0.25 M NaCl. The homogenate was clarified by centrifuging at 27,000 x *g* and the  
340 supernatant was applied to a HiTrap-Ni column (GE Healthcare) pre-equilibrated with  
341 the lysis buffer. Proteins were eluted with a 10–300 mM imidazole gradient in 10 mM  
342 potassium phosphate, pH 8.0, containing 0.25 M NaCl. Fractions containing His<sub>6</sub>-CtpA  
343 were collected. The N-terminal His tag was removed using thrombin (0.5 units/mg) by  
344 dialyzing against 20 mM Tris, pH 8.0, 150 mM NaCl overnight at 4 °C. Untagged CtpA  
345 was further purified with HiTrap-Q in 10 mM Tris, pH 8.0, and a 50–500 mM NaCl  
346 gradient and polished by gel filtration in 10 mM Tris, pH 8.0, and 150 mM NaCl using  
347 Superdex 200 prep grade column (16 x 600 mm, GE Healthcare).

348 **Purification of LbcA.** DNA encoding amino acid 49 to the C-terminus of LbcA  
349 (LbcA[ $\Delta$ N48]) was subcloned into the NdeI and HindIII sites of plasmid pET24b.  
350 Plasmids encoding N-terminal His<sub>6</sub>-tagged LbcA proteins were constructed similarly by  
351 subcloning fragments into the NdeI and BamHI sites of plasmid pET15b. *E. coli*  
352 BL21(DE3) transformants were grown at 37°C to OD<sub>600</sub> = 0.5 before being induced with

353 0.5 mM IPTG and incubated at 37°C for another 3 h. His<sub>6</sub>-tagged LbcA protein was  
354 purified with HiTrap-Ni in 10 mM potassium phosphate, pH 8.0, 0.25 M NaCl, and a 10–  
355 300 mM imidazole gradient, followed by HiTrap-Q in 10 mM Tris, pH 8.0, and a 50–500  
356 mM NaCl gradient. The final polish of LbcA was done in a Superdex 200 prep-grade  
357 column preequilibrated with 10 mM Tris, pH 8.0, and 150 mM NaCl.

358 **Protein crystallization and structural solution.** CtpA( $\Delta$ N37) was crystallized at  
359 20°C by the sitting-drop vapor diffusion method using 0.1 M sodium acetate, pH 4.0,  
360 and 0.6 M ammonium dihydrogen phosphate at a concentration of 33 mg/mL. Diffraction  
361 data were collected at the Lilly Research Laboratories Collaborative Access Team  
362 (LRL-CAT) beamline of the Advanced Photon Source (APS) at Argonne National  
363 Laboratory and processed with Mosflm software. Se-derived crystals diffracted to 3.3 Å,  
364 which was better than the native crystals, so the Se-derived data were used to solve the  
365 CtpA structure. Autosol of Phenix was used to locate Se sites and the resulting map  
366 was used to build the initial model. However, the map quality from the SAD method was  
367 not good enough to build the CtpA model due to a low anomalous signal (only 4 high-  
368 occupancy Se were identified in one asymmetric unit). In combination with molecular  
369 replacement, the structure of CtpA( $\Delta$ N37) was determined by combining MR-SAD using  
370 the core domain of *B. subtilis* CtpB (PDB ID 4C2C) as the search model. The structure  
371 of CtpA( $\Delta$ N37, S302A) was solved by PHASER of Phenix using CtpA( $\Delta$ N37) as the  
372 search model.

373 LbcA( $\Delta$ N48) was crystallized at 20°C by the sitting-drop vapor diffusion method  
374 using 0.1 M sodium acetate, pH 4.6, and 1.9 M ammonium dihydrogen phosphate at a  
375 concentration of 45 mg/mL. Diffraction data were collected at the Life Sciences

376 Collaborative Access Team (LS-CAT) beamline of APS and were processed with  
377 Mosflm. The best data set was from Se-derived crystals which diffracted to 3.5 Å, so the  
378 Se-derived diffraction data were used to solve the LbcA structure. Se sites were  
379 determined by the SAD method using Autosol of Phenix (33). All models of CtpA and  
380 LbcA were built in Coot (34) and refined with Phenix.refine (35).

381 The crystal structures of CtpA, CtpA(S302A), and LbcA have been deposited in  
382 the Protein Data Bank under accession codes 7RPQ, 7RQH, and 7RQF, respectively.

383 ***In vitro* proteolysis assay.** CtpA and LbcA proteins were purified as described  
384 above. To purify His<sub>6</sub>-PA1198, *E. coli* strain M15 [pREP4] (Qiagen) containing  
385 pAJD2948 was grown in 500 mL of LB broth at 37°C to an OD<sub>600</sub> of 0.6-1.0. Protein  
386 production was induced by adding 1 mM IPTG and incubation at 37 °C for 3 h, after  
387 which cells were harvested by centrifugation. His<sub>6</sub>-PA1198 was purified under native  
388 conditions by nickel–nitrilotriacetic acid–agarose affinity chromatography in buffer  
389 containing 50 mM NaH<sub>2</sub>PO<sub>4</sub> and 300 mM NaCl, as recommended by the manufacturer  
390 (Qiagen). Protein was eluted in 50 mM NaH<sub>2</sub>PO<sub>4</sub>, 300 mM NaCl, 50 mM imidazole, pH 8.  
391 Assays were done as described previously (23, 36). Reactions were terminated by  
392 adding SDS-PAGE sample buffer and incubating at 90°C for 10 min. Samples were  
393 separated by SDS-PAGE and stained with ProtoBlue Safe (National Diagnostics). For  
394 experiments with mutant CtpA proteins, ImageJ analysis was used to determine the  
395 densities of the His<sub>6</sub>-PA1198 bands. The amount of His<sub>6</sub>-PA1198 degraded in each  
396 reaction was determined by comparing His<sub>6</sub>-PA1198 band density to that in the reaction  
397 with inactive CtpA(S302A). Average values from two independent experiments are  
398 reported.

399           ***In vivo* CtpA activity assay.** Wild-type *ctpA* was amplified from *P. aeruginosa*  
400 PAK chromosomal DNA using a primer that annealed about 30 bp upstream of the *ctpA*  
401 start codon and a reverse primer that annealed immediately downstream of the stop  
402 codon. A fragment encoding CtpA( $\Delta$ C6) was generated with a reverse primer that  
403 annealed downstream of codon 430 and incorporated a stop codon. Fragments  
404 encoding CtpA-L426K L430K or CtpA-L426A L430A were generated with reverse  
405 primers that incorporated the mutagenic mismatches. A fragment encoding CtpA(S302A)  
406 was generated by amplifying *ctpA* from *P. aeruginosa* strain AJDP1140 DNA using the  
407 same primer pairs used to amplify wild-type *ctpA*. All fragments were cloned into  
408 pHERD26T using EcoRI and XbaI restriction sites added by the amplification primers.

409           Fragments encoding LbcA( $\Delta$ N84) and LbcA( $\Delta$ N165) were generated by  
410 amplifying one fragment with a forward primer that annealed ~ 40 bp upstream of the  
411 *lbcA* start codon and a reverse primer that annealed at codon 31, and a second  
412 fragment with a forward primer that annealed at codon 85 or codon 166 and a reverse  
413 primer that annealed at the *lbcA* stop codon. The forward primer for the second  
414 fragments had a 5' tail complementary to the end of the first fragment (codons 25-31).  
415 The first fragment and second fragments were joined by splicing overlap extension PCR  
416 (37). The resulting fragments encoded LbcA with internal deletions that removed  
417 codons 32-84 ( $\Delta$ N84) or codons 32-165 ( $\Delta$ N165). Codons 1-31 were retained, encoding  
418 the signal sequence followed by 15 amino acids corresponding to the N-terminus of  
419 mature wild-type LbcA, to ensure normal signal sequence processing, lipidation, and  
420 outer membrane trafficking. A fragment encoding wild-type *lbcA* was generated by  
421 amplifying *lbcA* from *P. aeruginosa* DNA using a forward primer that annealed ~ 40 bp

422 upstream of the start codon and a reverse primer that annealed at the *lbcA* stop codon.

423 All fragments were cloned into pHERD26T using EcoRI and HindIII restriction sites

424 added by the amplification primers.

425 Plasmids were introduced into  $\Delta ctpA$  or  $\Delta lbcA$  mutants by electroporation (38).

426 Saturated cultures were diluted into 5 mL of LB broth containing 75  $\mu\text{g/mL}$  tetracycline,

427 in 18-mm diameter test tubes, at  $\text{OD}_{600}$  of 0.05. Cultures were grown on a roller drum at

428 37 °C for 5 h. Cells were harvested by centrifugation and resuspended in SDS-PAGE

429 sample buffer at equal concentrations based on culture  $\text{OD}_{600}$ . Samples were separated

430 by SDS-PAGE and transferred to nitrocellulose by semi-dry electroblotting.

431 Chemiluminescent detection followed incubation with polyclonal antisera against CtpA,

432 LbcA, or PA1198, and then goat anti-rabbit IgG (Sigma) horseradish peroxidase

433 conjugate.

434

435 **ACKNOWLEDGEMENTS**

436 Diffraction data for CtpA were collected at the Lilly Research Laboratories Collaborative  
437 Access Team (LRL-CAT) beamline and diffraction data of LbcA were collected at the  
438 Life Sciences Collaborative Access Team (LS-CAT) beamline of the Advanced Photon  
439 Source (APS). The APS is a U.S. Department of Energy (DOE) Office of Science User  
440 Facility operated for the DOE Office of Science by Argonne National Laboratory under  
441 Contract No. DE-AC02-06CH11357. Cryo-EM data were collected at the David Van  
442 Andel Advanced Cryo-Electron Microscopy Suite at Van Andel Institute. We thank  
443 Dolonchapa Chakraborty for supplying plasmid pAJD2948 and His<sub>6</sub>-PA1198 protein,  
444 Gongpu Zhao and Xing Meng for help with data collection, and David Nadziejka for  
445 technical editing of the manuscript. This study was supported by U.S. National Institutes  
446 of Health grant R01 AI136901 (to A.D.) and by Van Andel Institute (to H.L.). The content  
447 is solely the responsibility of the authors and does not necessarily represent the official  
448 views of the National Institutes of Health.  
449

## 450 REFERENCES

- 451 1. Vollmer W, Blanot D, de Pedro MA. 2008. Peptidoglycan structure and  
452 architecture. *FEMS Microbiol Rev* 32:149-67.
- 453 2. Pazos M, Peters K, Vollmer W. 2017. Robust peptidoglycan growth by dynamic  
454 and variable multi-protein complexes. *Curr Opin Microbiol* 36:55-61.
- 455 3. Vollmer W. 2012. Bacterial growth does require peptidoglycan hydrolases. *Mol*  
456 *Microbiol* 86:1031-5.
- 457 4. Park SH, Kim YJ, Lee HB, Seok YJ, Lee CR. 2020. Genetic Evidence for Distinct  
458 Functions of Peptidoglycan Endopeptidases in *Escherichia coli*. *Front Microbiol*  
459 11:565767.
- 460 5. Singh SK, Parveen S, SaiSree L, Reddy M. 2015. Regulated proteolysis of a  
461 cross-link-specific peptidoglycan hydrolase contributes to bacterial  
462 morphogenesis. *Proc Natl Acad Sci U S A* 112:10956-61.
- 463 6. Rawlings ND, Barrett AJ, Bateman A. 2010. MEROPS: the peptidase database.  
464 *Nucleic Acids Res* 38:D227-33.
- 465 7. Ye F, Zhang M. 2013. Structures and target recognition modes of PDZ domains:  
466 recurring themes and emerging pictures. *Biochem J* 455:1-14.
- 467 8. Chueh CK, Som N, Ke LC, Ho MR, Reddy M, Chang CI. 2019. Structural Basis  
468 for the Differential Regulatory Roles of the PDZ Domain in C-Terminal  
469 Processing Proteases. *mBio* 10.
- 470 9. Bandara AB, Sriranganathan N, Schurig GG, Boyle SM. 2005. Carboxyl-terminal  
471 protease regulates *Brucella suis* morphology in culture and persistence in  
472 macrophages and mice. *J Bacteriol* 187:5767-75.
- 473 10. Seo J, Darwin AJ. 2013. The *Pseudomonas aeruginosa* periplasmic protease  
474 CtpA can affect systems that impact its ability to mount both acute and chronic  
475 infections. *Infect Immun* 81:4561-70.
- 476 11. Deng CY, Deng AH, Sun ST, Wang L, Wu J, Wu Y, Chen XY, Fang RX, Wen TY,  
477 Qian W. 2014. The periplasmic PDZ domain-containing protein Prc modulates  
478 full virulence, envelops stress responses, and directly interacts with dipeptidyl  
479 peptidase of *Xanthomonas oryzae* pv. *oryzae*. *Mol Plant Microbe Interact* 27:101-  
480 12.
- 481 12. Carroll RK, Rivera FE, Cavaco CK, Johnson GM, Martin D, Shaw LN. 2014. The  
482 lone S41 family C-terminal processing protease in *Staphylococcus aureus* is  
483 localized to the cell wall and contributes to virulence. *Microbiology (Reading)*  
484 160:1737-1748.
- 485 13. Bandara AB, DeShazer D, Inzana TJ, Sriranganathan N, Schurig GG, Boyle SM.  
486 2008. A disruption of *ctpA* encoding carboxy-terminal protease attenuates  
487 *Burkholderia mallei* and induces partial protection in CD1 mice. *Microb Pathog*  
488 45:207-16.
- 489 14. Nash ZM, Cotter PA. 2019. Regulated, sequential processing by multiple  
490 proteases is required for proper maturation and release of *Bordetella* filamentous  
491 hemagglutinin. *Mol Microbiol* 112:820-836.
- 492 15. Su MY, Som N, Wu CY, Su SC, Kuo YT, Ke LC, Ho MR, Tzeng SR, Teng CH,  
493 Mengin-Lecreulx D, Reddy M, Chang CI. 2017. Structural basis of adaptor-  
494 mediated protein degradation by the tail-specific PDZ-protease Prc. *Nat Commun*  
495 8:1516.



- 496 16. Campo N, Rudner DZ. 2006. A branched pathway governing the activation of a  
497 developmental transcription factor by regulated intramembrane proteolysis. *Mol*  
498 *Cell* 23:25-35.
- 499 17. Rudner DZ, Losick R. 2002. A sporulation membrane protein tethers the pro-  
500 sigmaK processing enzyme to its inhibitor and dictates its subcellular localization.  
501 *Genes Dev* 16:1007-18.
- 502 18. Mastny M, Heuck A, Kurzbauer R, Heiduk A, Boisguerin P, Volkmer R, Ehrmann  
503 M, Rodrigues CD, Rudner DZ, Clausen T. 2013. CtpB assembles a gated  
504 protease tunnel regulating cell-cell signaling during spore formation in *Bacillus*  
505 *subtilis*. *Cell* 155:647-58.
- 506 19. Hoge R, Laschinski M, Jaeger KE, Wilhelm S, Rosenau F. 2011. The subcellular  
507 localization of a C-terminal processing protease in *Pseudomonas aeruginosa*.  
508 *FEMS Microbiol Lett* 316:23-30.
- 509 20. Paterson DL. 2006. The epidemiological profile of infections with multidrug-  
510 resistant *Pseudomonas aeruginosa* and *Acinetobacter species*. *Clin Infect Dis* 43  
511 Suppl 2:S43-8.
- 512 21. Tumbarello M, De Pascale G, Trecarichi EM, Spanu T, Antonicelli F, Maviglia R,  
513 Pennisi MA, Bello G, Antonelli M. 2013. Clinical outcomes of *Pseudomonas*  
514 *aeruginosa* pneumonia in intensive care unit patients. *Intensive Care Med*  
515 39:682-92.
- 516 22. Crivaro V, Di Popolo A, Caprio A, Lambiase A, Di Resta M, Borriello T, Scarcella  
517 A, Triassi M, Zarrilli R. 2009. *Pseudomonas aeruginosa* in a neonatal intensive  
518 care unit: molecular epidemiology and infection control measures. *BMC Infect*  
519 *Dis* 9:70.
- 520 23. Srivastava D, Seo J, Rimal B, Kim SJ, Zhen S, Darwin AJ. 2018. A Proteolytic  
521 Complex Targets Multiple Cell Wall Hydrolases in *Pseudomonas aeruginosa*.  
522 *mBio* 9.
- 523 24. Graham JB, Canniff NP, Hebert DN. 2019. TPR-containing proteins control  
524 protein organization and homeostasis for the endoplasmic reticulum. *Crit Rev*  
525 *Biochem Mol Biol* 54:103-118.
- 526 25. Zeytuni N, Zarivach R. 2012. Structural and functional discussion of the tetra-  
527 trico-peptide repeat, a protein interaction module. *Structure* 20:397-405.
- 528 26. Blatch GL, Lassel M. 1999. The tetratricopeptide repeat: a structural motif  
529 mediating protein-protein interactions. *Bioessays* 21:932-9.
- 530 27. Chakraborty D, Darwin AJ. 2021. Direct and indirect interactions promote  
531 complexes of the lipoprotein LbcA, the CtpA protease and its substrates, and  
532 other cell wall proteins in *Pseudomonas aeruginosa*. *J Bacteriol*  
533 doi:10.1128/JB.00393-21:JB0039321.
- 534 28. Ntountoumi C, Vlastaridis P, Mossialos D, Stathopoulos C, Iliopoulos I,  
535 Promponas V, Oliver SG, Amoutzias GD. 2019. Low complexity regions in the  
536 proteins of prokaryotes perform important functional roles and are highly  
537 conserved. *Nucleic Acids Res* 47:9998-10009.
- 538 29. Konovalova A, Silhavy TJ. 2015. Outer membrane lipoprotein biogenesis: Lol is  
539 not the end. *Philos Trans R Soc Lond B Biol Sci* 370:20150030.
- 540 30. Lewenza S, Mhlanga MM, Pugsley AP. 2008. Novel inner membrane retention  
541 signals in *Pseudomonas aeruginosa* lipoproteins. *J Bacteriol* 190:6119-25.

- 542 31. Narita S, Tokuda H. 2007. Amino acids at positions 3 and 4 determine the  
543 membrane specificity of *Pseudomonas aeruginosa* lipoproteins. *J Biol Chem*  
544 282:13372-8.
- 545 32. Clausen T, Kaiser M, Huber R, Ehrmann M. 2011. HTRA proteases: regulated  
546 proteolysis in protein quality control. *Nat Rev Mol Cell Biol* 12:152-62.
- 547 33. Adams PD, Afonine PV, Bunkoczi G, Chen VB, Echols N, Headd JJ, Hung LW,  
548 Jain S, Kapral GJ, Grosse Kunstleve RW, McCoy AJ, Moriarty NW, Oeffner RD,  
549 Read RJ, Richardson DC, Richardson JS, Terwilliger TC, Zwart PH. 2011. The  
550 Phenix software for automated determination of macromolecular structures.  
551 *Methods* 55:94-106.
- 552 34. Casanal A, Lohkamp B, Emsley P. 2020. Current developments in Coot for  
553 macromolecular model building of Electron Cryo-microscopy and  
554 Crystallographic Data. *Protein Sci* 29:1069-1078.
- 555 35. van Zundert GCP, Moriarty NW, Sobolev OV, Adams PD, Borrelli KW. 2021.  
556 Macromolecular refinement of X-ray and cryoelectron microscopy structures with  
557 Phenix/OPLS3e for improved structure and ligand quality. *Structure* 29:913-921  
558 e4.
- 559 36. Chung S, Darwin AJ. 2020. The C-terminus of substrates is critical but not  
560 sufficient for their degradation by the *Pseudomonas aeruginosa* CtpA protease. *J*  
561 *Bacteriol* doi:10.1128/JB.00174-20.
- 562 37. Heckman KL, Pease LR. 2007. Gene splicing and mutagenesis by PCR-driven  
563 overlap extension. *Nat Protoc* 2:924-932.
- 564 38. Choi KH, Kumar A, Schweizer HP. 2006. A 10-min method for preparation of  
565 highly electrocompetent *Pseudomonas aeruginosa* cells: application for DNA  
566 fragment transfer between chromosomes and plasmid transformation. *J Microbiol*  
567 *Methods* 64:391-397.
- 568 39. Strom MS, Lory S. 1986. Cloning and expression of the pilin gene of  
569 *Pseudomonas aeruginosa* PAK in *Escherichia coli*. *J Bacteriol* 165:367-372.
- 570 40. Studier FW, Rosenberg AH, Dunn JJ, Dubendorff JW. 1990. Use of T7 RNA  
571 polymerase to direct expression of cloned genes. *Methods in Enzymology*  
572 185:60-89.
- 573 41. Qiu D, Damron FH, Mima T, Schweizer HP, Yu HD. 2008. PBAD-based shuttle  
574 vectors for functional analysis of toxic and highly regulated genes in  
575 *Pseudomonas* and *Burkholderia* spp. and other bacteria. *Appl Environ Microbiol*  
576 74:7422-7426.  
577

578 **FIGURES AND LEGENDS**

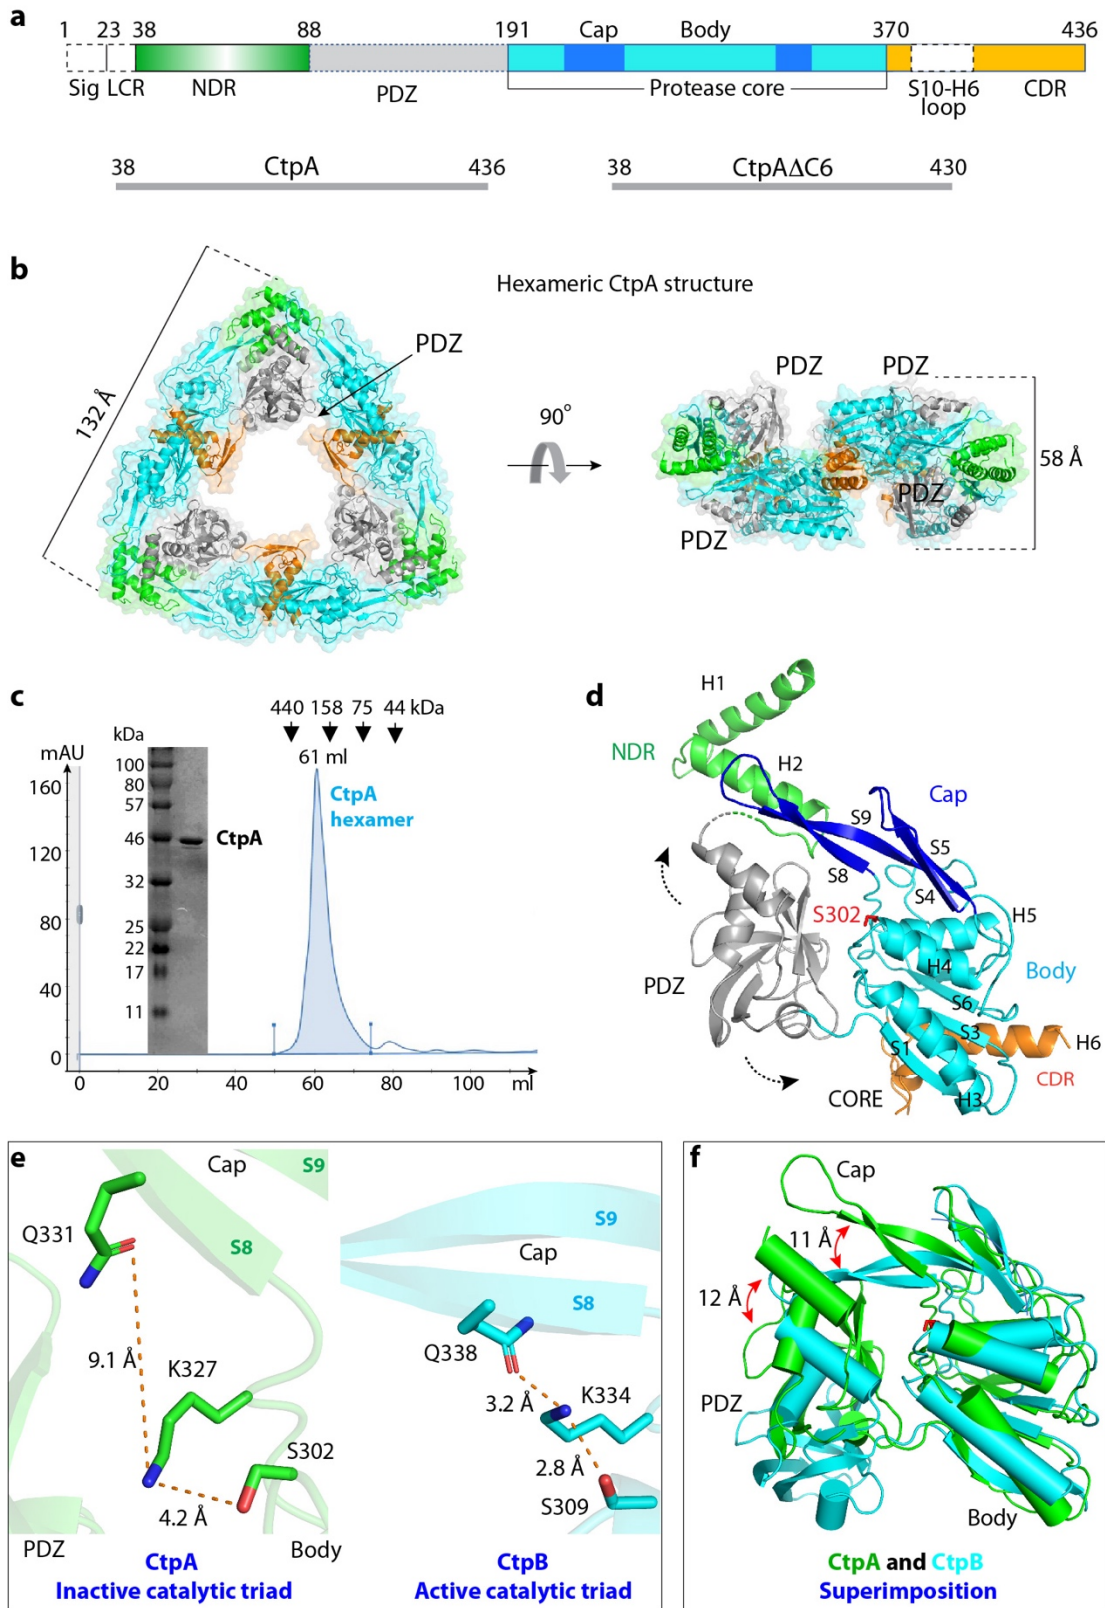

579

580 **FIG 1** Overall structure of CtpA. (a) Top: CtpA domain organization. The dashed lines  
581 indicate the disordered regions (PDZ and the S10-H6 connecting loop) that are not  
582 resolved in the crystal structure. NDR, N-terminal dimerization region; CDR, C-terminal  
583 dimerization region. The sequence ranges of the two CtpA constructs used this study  
584 are shown in the lower panels. (b) Cartoon and transparent surface views of CtpA  
585 hexamer. The domains are colored according to the depiction in panel a. (c) SDS-PAGE  
586 analysis and gel filtration profile of CtpA. (d) A CtpA subunit in cartoon view. Secondary  
587 structural elements in CtpA are labeled, except in the PDZ domain. The two dashed  
588 arrows indicate the mobile PDZ domain in the CtpA hexamer. (e) Comparison of the  
589 catalytic triads of Pa CtpA and Bs CtpB (PDB ID 4C2E). The S8 and S9 labels refer to  
590  $\beta$ -strands 8 and 9 in the cap region. (f) Superposition of the core domains of inactive Pa  
591 CtpA (green) and active Bs CtpB (cyan). Catalytic Ser-302 in CtpA and Ser-309 in CtpB  
592 are in red sticks. Red arrows indicate lifted-up (CtpA) and clamped-down positions  
593 (CtpB) of the cap subdomains.  
594

595

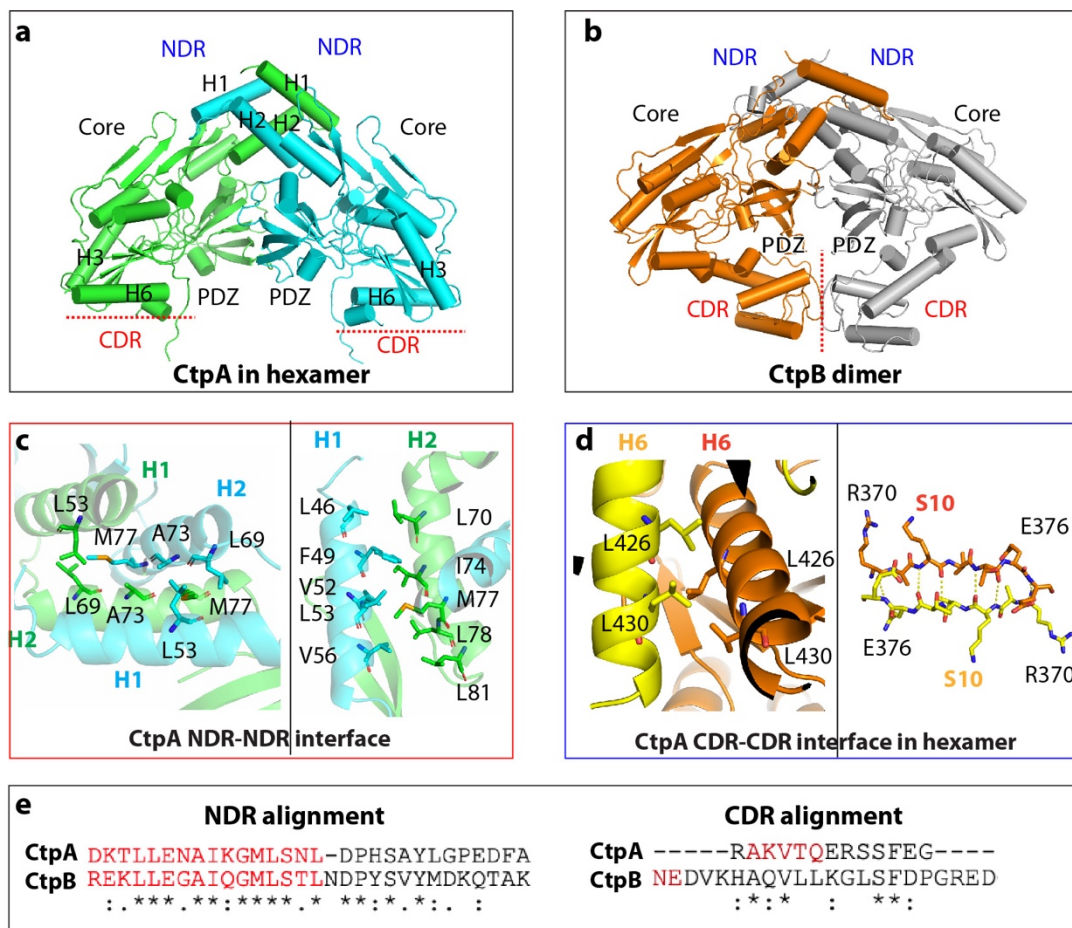

596

597

598

599

600

601

602

603

604

605

606

**FIG 2** Different oligomerization modes of Pa CtpA and Bs CtpB. (a) A CtpA dimer extracted from the CtpA hexamer. (b) Bs CtpB dimer (PDB ID 4C2E). (c) The N-terminal dimerization interface of CtpA involves hydrophobic interactions between two H2 (left) and between H1 and H2 (right). (d) The C-terminal dimerization interface of CtpA involves a short leucine zipper-like interaction between two H6 helices and antiparallel  $\beta$ -sheet formation between two S10. (e) Alignment of the conserved NDR sequence and divergent CDR between Pa CtpA and Bs CtpB.

607

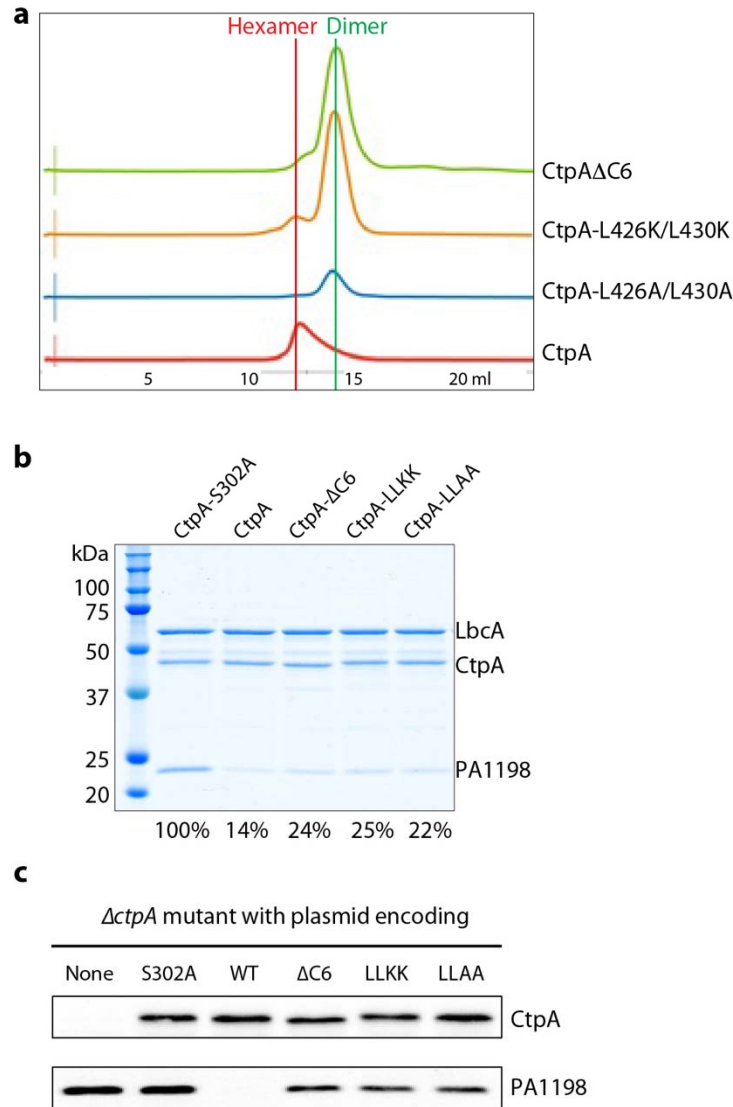

608

609

610

611 **Fig. 3. Full protease activity of CtpA requires C-terminal dimerization region. a)**

612 Elution profiles of wild-type and mutant CtpA proteins. **b)** Substrate degradation assay

613 *in vitro*. His<sub>6</sub>-PA1198 served as the substrate for the assay. Gels from a single

614 experiment are shown, but the amount of PA1198 degradation is the average from two

615 independent experiments, determined as described in Methods. The number below

616 each lane is the percentage of remaining PA1198 after 3 h, relative to the first lane

617 using the inactive CtpA. **c)** Substrate degradation *in vivo*. Plasmid-encoded protease-

618 dead CtpA(S302A), wild-type (WT),  $\Delta C6$ , L426K/L430K (LLKK), L426A/L430A (LLAA)

619 were produced in a *P. aeruginosa*  $\Delta ctpA$  strain. None = empty plasmid vector control.

620 The CtpA proteins and accumulation of the PA1198 substrate were detected by

621 immunoblot analysis with polyclonal antisera.

622

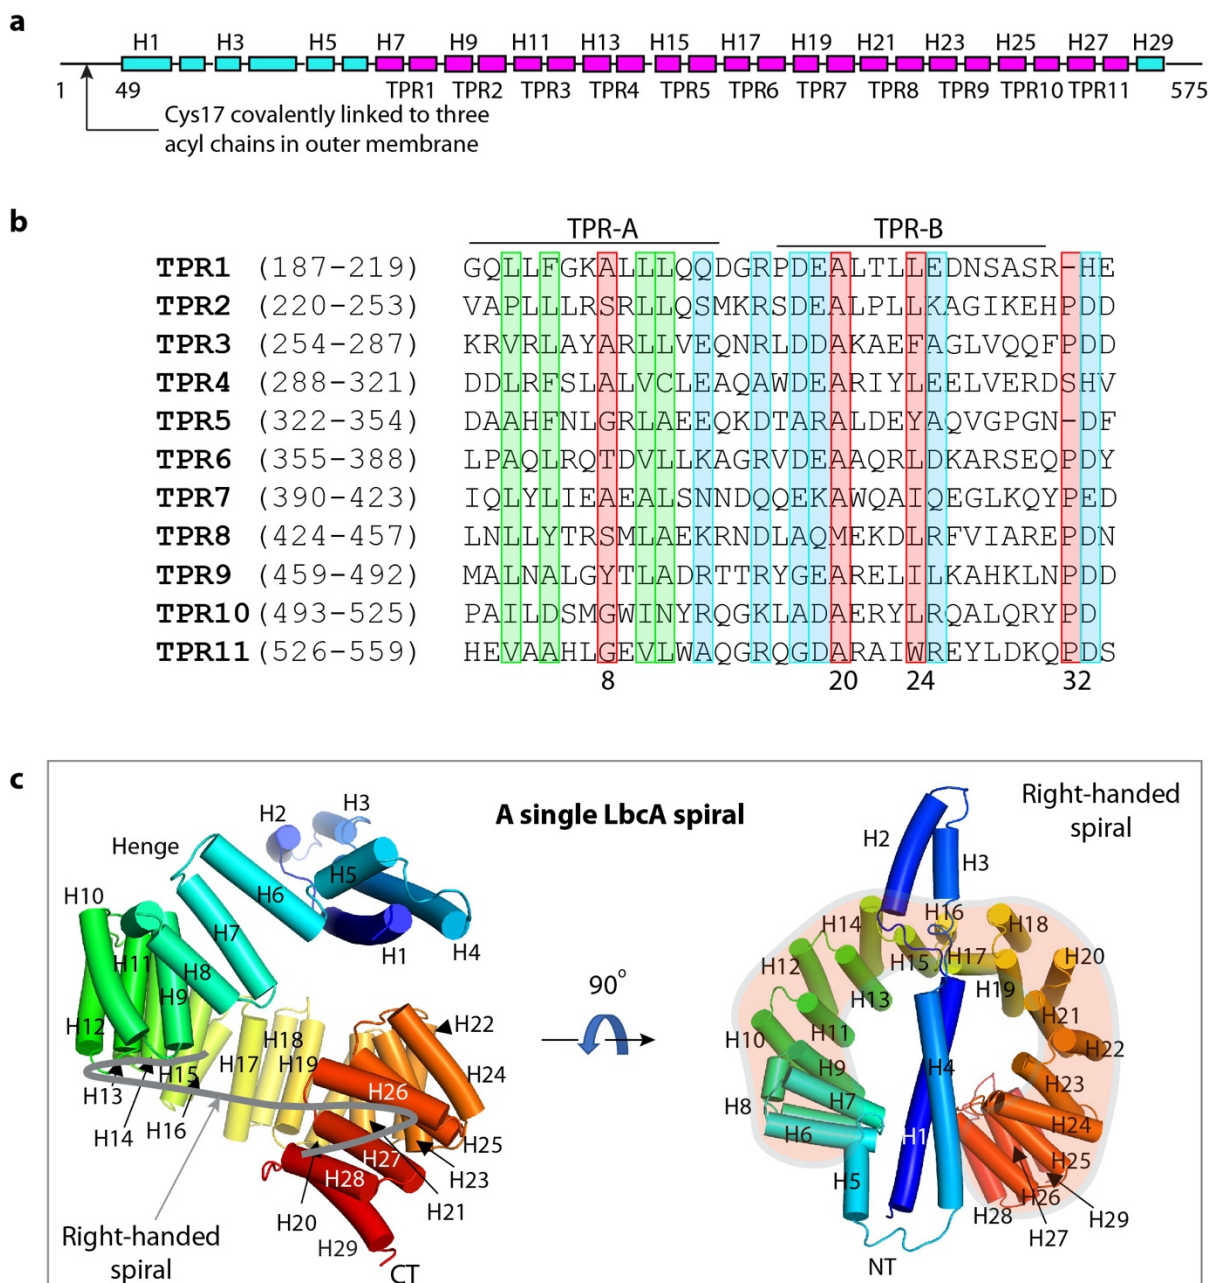

623  
624

625 **FIG 4** Overall structure of LbcA. (a) Domain organization of LbcA. The TPR motifs are  
626 shown in magenta. Also shown are two LbcA constructs used in this study. (b)  
627 Sequence alignment of the 11 TPRs of LbcA. The signature residues of TPR are  
628 marked in the red rectangles. The highly homologous hydrophobic residues are in green  
629 boxes and the highly homologous charged residues are in the blue boxes. (c) The  
630 crystal structure of LbcA( $\Delta$ N48) contains an N-terminal extension with 4 helices and a  
631 C-terminal superhelix composed of 11 TPRs. The thick gray curve in the left panel  
632 follows the right-handed spiral feature of the TPRs.  
633

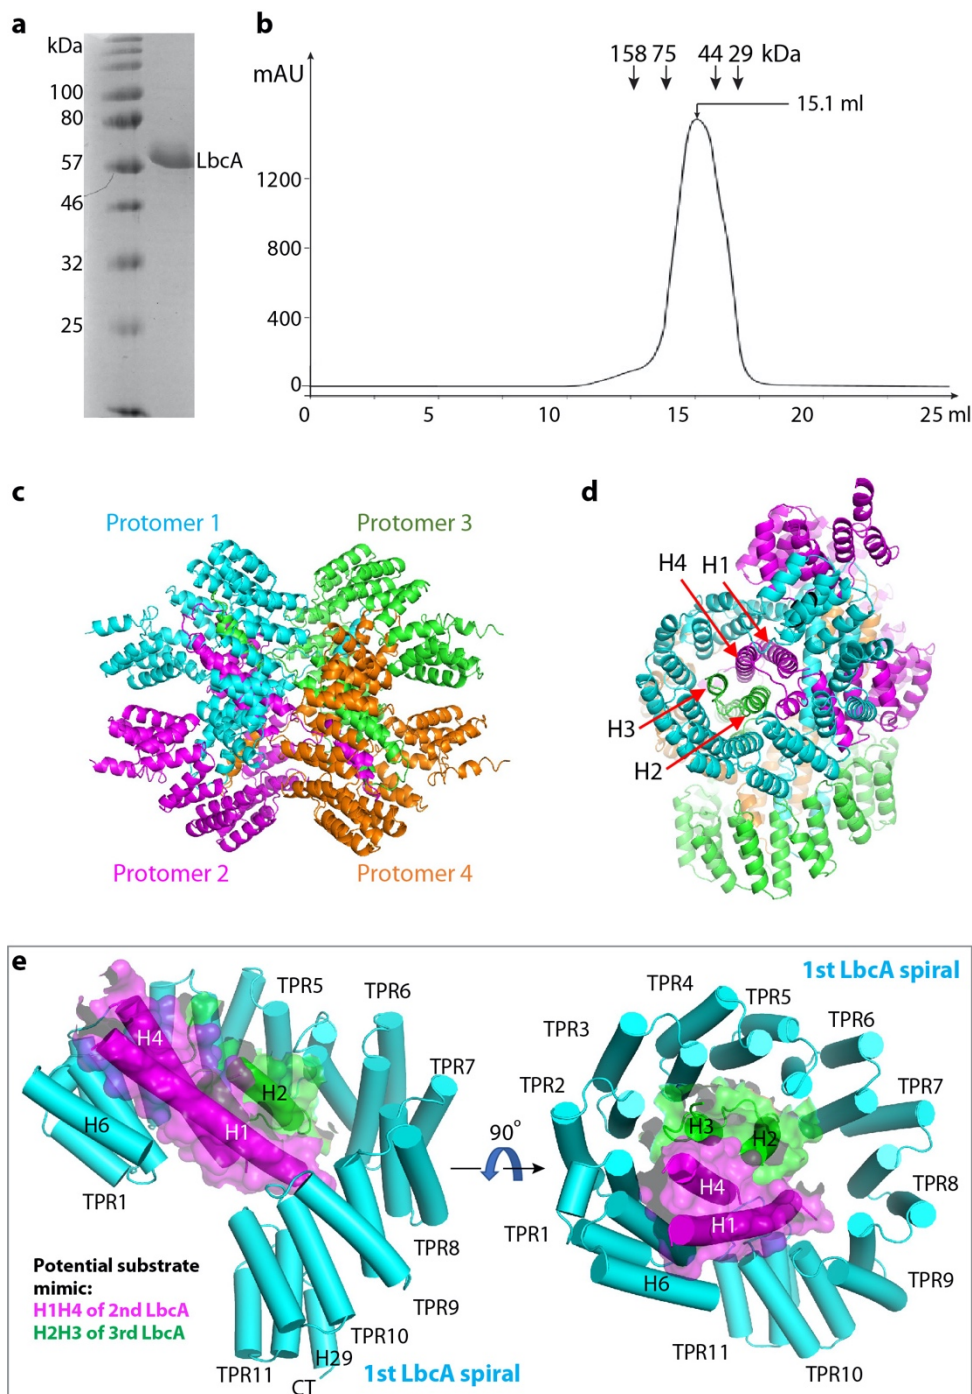

634  
635  
636  
637  
638  
639  
640  
641  
642  
643

**FIG 5** LbcA is a monomer in solution but assembles a tetramer in crystal. (a) Coomassie blue stained SDS-PAGE gel of the purified of LbcA $\Delta$ N48. (b) Superdex-200 elution profile of LbcA $\Delta$ N48. LbcA was eluted from gel filtration column at a volume corresponding to the monomeric state. (c) LbcA forms an intertwined tetramer in the crystal lattice. The four protomers are individually colored. (d) This LbcA tetramer view shows that the helices H1 and H4 of protomer 2 and helices H2 and H3 of protomer 3 form a 4-helix bundle inside the super helical coil of protomer 1 in the crystal lattice. (e) H2H3 of a second LbcA (magenta cartoon and transparent surface) and H1H4 of a third



644 LbcA (light blue cartoon and transparent surface) insert into the first LbcA spiral, likely  
645 mimicking the substrate binding by the first LbcA spiral.  
646

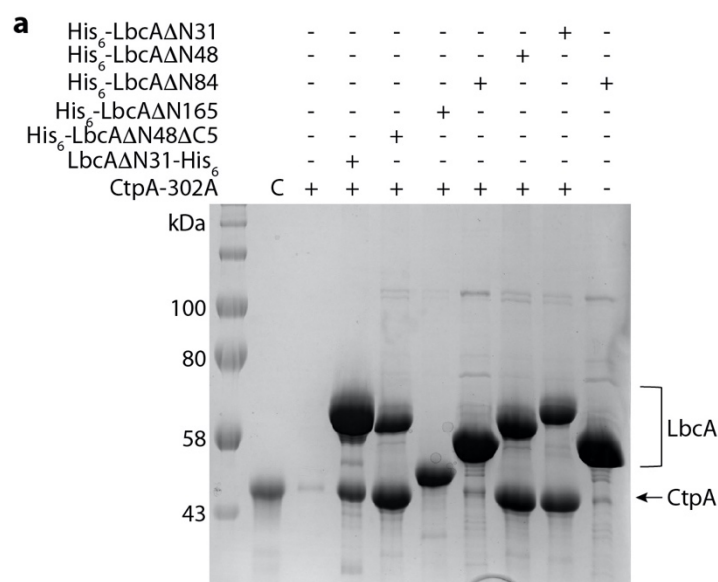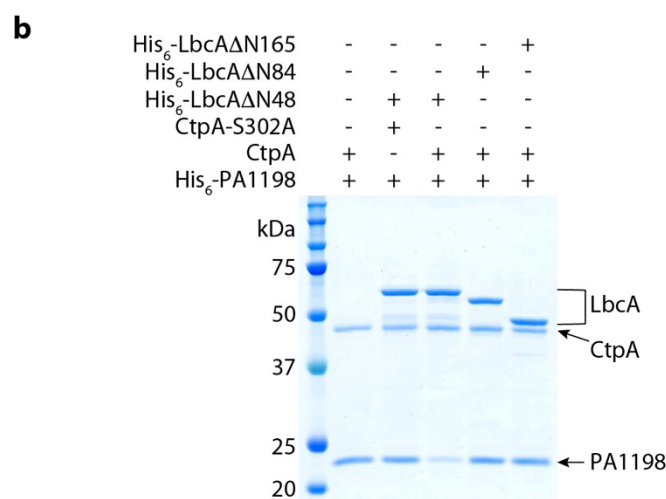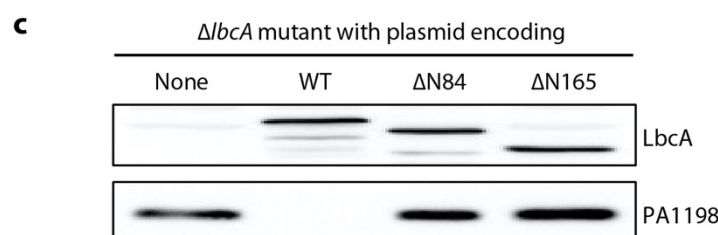

647  
648

649 **FIG 6** The LbcA N-terminal extension is essential for the protease activity of CtpA. (a) CtpA pull-  
650 down assay using various N-terminal and C-terminal deletion mutants of LbcA. Lane 2 is the  
651 CtpA input control (C). Lane 3 is the background binding of CtpA to Ni beads. (b) *In vitro*  
652 substrate (PA1198) degradation assay. (c) Substrate degradation *in vivo*. Plasmids encoding  
653 wild-type LbcA (WT), LbcA(ΔN84), or LbcA(ΔN165) were transformed into a *P. aeruginosa*  
654 *ΔlbcA* mutant. None = empty plasmid vector control. The LbcA proteins and accumulation of the  
655 PA1198 substrate were detected by immunoblot analysis with polyclonal antisera.

656 **Supplemental Table 1. Strains and plasmids used in this study**

| 657 | Nam                                 | Genotype/Features                                                                                                                                           | Reference or Source |
|-----|-------------------------------------|-------------------------------------------------------------------------------------------------------------------------------------------------------------|---------------------|
| 658 |                                     |                                                                                                                                                             |                     |
| 659 | <b><i>P. aeruginosa</i> strains</b> |                                                                                                                                                             |                     |
| 660 | PAK                                 | wild-type PAK strain                                                                                                                                        | (39)                |
| 661 | AJDP730                             | PAK $\Delta$ <i>ctpA</i>                                                                                                                                    | (23)                |
| 662 | AJDP1091                            | PAK $\Delta$ <i>lbcA::aacC1</i>                                                                                                                             | (23)                |
| 663 | AJDP1140                            | PAK <i>ctpA-S302A</i>                                                                                                                                       | (23)                |
| 664 |                                     |                                                                                                                                                             |                     |
| 665 | <b><i>E. coli</i> strain</b>        |                                                                                                                                                             |                     |
| 666 | BL21(DE3)                           | F <sup>-</sup> <i>ompT gal [dcm] [lon] hsdS<sub>B</sub> (r<sub>B</sub><sup>-</sup> m<sub>B</sub><sup>-</sup>; E. coli B strain) <math>\lambda</math>DE3</i> | (40)                |
| 667 |                                     |                                                                                                                                                             |                     |
| 668 | <b>Plasmids</b>                     |                                                                                                                                                             |                     |
| 669 | pET15b                              | Amp <sup>r</sup> , pMB1 <i>ori</i> , <i>T7p</i> expression vector                                                                                           | Novagen             |
| 670 | pET24b                              | Kan <sup>r</sup> , pMB1 <i>ori</i> , <i>T7p</i> expression vector                                                                                           | Novagen             |
| 671 | pHERD26T                            | Tet <sup>r</sup> , pMB1 <i>ori</i> , <i>araBp</i> expression vector                                                                                         | (41)                |
| 672 | pQE-30                              | Amp <sup>r</sup> , Col E1 <i>ori</i> , <i>T5p</i> expression vector                                                                                         | Qiagen              |
| 673 | pAJD2948                            | <i>T5p-his<sub>6</sub>-PA1198</i> in pQE-30                                                                                                                 | (27)                |
| 674 | pAJD3037                            | <i>araBp-ctpA</i> in pHERD26T                                                                                                                               | This study          |
| 675 | pAJD3038                            | <i>araBp-ctpA<math>\Delta</math>C6</i> in pHERD26T                                                                                                          | This study          |
| 676 | pAJD3039                            | <i>araBp-ctpA-L426K L430K</i> in pHERD26T                                                                                                                   | This study          |
| 677 | pAJD3045                            | <i>araBp-ctpA-S302A</i> in pHERD26T                                                                                                                         | This study          |
| 678 | pAJD3063                            | <i>araBp-ctpA-L426A L430A</i> in pHERD26T                                                                                                                   | This study          |
| 679 | pAJD3109                            | <i>araBp-lbcA</i> in pHERD26T                                                                                                                               | This study          |
| 680 | pAJD3110                            | <i>araBp-lbcA<math>\Delta</math>N84</i> in pHERD26T                                                                                                         | This study          |
| 681 | pAJD3111                            | <i>araBp-lbcA<math>\Delta</math>N165</i> in pHERD26T                                                                                                        | This study          |
| 682 | pET15b_CtpA $\Delta$ N37            | <i>T7p-his<sub>6</sub>-ctpA<math>\Delta</math>N37</i> in pET15b                                                                                             | This study          |

|     |                             |                                                           |            |
|-----|-----------------------------|-----------------------------------------------------------|------------|
| 683 | pET15b_CtpAΔN37ΔC6          | <i>T7p-his<sub>6</sub>-ctpAΔN37ΔC6</i> in pET15b          | This study |
| 684 | pET15b_CtpAΔN37_S302A       | <i>T7p-his<sub>6</sub>-ctpAΔN37_S302A</i> in pET15b       | This study |
| 685 | pET15b_CtpAΔN37_L426K/L430K | <i>T7p-his<sub>6</sub>-ctpAΔN37_L426K L430K</i> in pET15b | This study |
| 686 | pET15b_CtpAΔN37_L426A/L430A | <i>T7p-his<sub>6</sub>-ctpAΔN37_L426A L430A</i> in pET15b | This study |
| 687 | pET24b_LbcAΔN48             | <i>T7p-lbcAΔN48-his<sub>6</sub></i> in pET24b             | This study |
| 688 | pET15b_LbcAΔN31             | <i>T7p-his<sub>6</sub>-lbcAΔN31</i> in pET15b             | This study |
| 689 | pET15b_LbcAΔN48             | <i>T7p-his<sub>6</sub>-lbcAΔN48</i> in pET15b             | This study |
| 690 | pET15b_LbcAΔN84             | <i>T7p-his<sub>6</sub>-lbcAΔN84</i> in pET15b             | This study |
| 691 | pET15b_LbcAΔN165            | <i>T7p-his<sub>6</sub>-lbcAΔN165</i> in pET15b            | This study |
| 692 | pET15b_LbcAΔN48ΔC5          | <i>T7p-his<sub>6</sub>-lbcAΔN48ΔC5</i> in pET15b          | This study |
| 693 |                             |                                                           |            |

---

694 **Supplemental Table 2. Crystallographic data collection and refinement statistics**

|                                                     | CtpA $\Delta$ N37_Se          | CtpA( $\Delta$ N37,<br>S302A) | LbcA $\Delta$ N48_Se           |
|-----------------------------------------------------|-------------------------------|-------------------------------|--------------------------------|
| <b>Data collection</b>                              |                               |                               |                                |
| Wavelength (Å)                                      | 0.97931                       | 1.07803                       | 0.97872                        |
| Space group                                         | H3                            | H3                            | P 32 2 1                       |
| Cell dimensions                                     |                               |                               |                                |
| <i>a</i> , <i>b</i> , <i>c</i> (Å)                  | 187.49, 187.49,<br>132.01     | 189.65, 189.65,<br>131.10     | 120.70, 120.70,<br>221.94      |
| $\alpha$ , $\beta$ , $\gamma$ (°)                   | 90.00, 90.00,<br>120.00       | 90.00, 90.00,<br>120.00       | 90.00, 90.00,<br>120.00        |
| Resolution (Å)                                      | 93.75 – 3.30 (3.48<br>-3.30)* | 94.82 – 3.2 (3.37 –<br>3.2)*  | 94.57 – 3.50 (3.69<br>– 3.50)* |
| <i>R</i> <sub>merge</sub> (%)                       | 16.7 (91.2)                   | 8.9 (142)                     | 18.3 (226)                     |
| <i>I</i> / $\sigma$ <i>I</i>                        | 10.8 (2.9)                    | 15.6 (2.0)                    | 13.2 (2.0)                     |
| Total reflections                                   | 301572 (44008)                | 297808 (44906)                | 536619 (78420)                 |
| Completeness (%)                                    | 100 (100)                     | 99.6 (99.9)                   | 100 (100)                      |
| Redundancy                                          | 11.6 (11.4)                   | 10.3 (10.6)                   | 22.1 (22.5)                    |
| <b>Refinement</b>                                   |                               |                               |                                |
| Resolution (Å)                                      | 39.83 – 3.30                  | 43.03 – 3.2                   | 60.39 – 3.50                   |
| No. reflections                                     | 26026                         | 28849                         | 24277                          |
| <i>R</i> <sub>work</sub> / <i>R</i> <sub>free</sub> | 0.2375 / 0.2636               | 0.2422/0.2654                 | 0.2470 / 0.2806                |
| No. of non-hydrogen atoms                           | 3933                          | 3931                          | 8352                           |
| Macromolecule                                       | 3933                          | 3931                          | 8352                           |
| Ligand                                              | 0                             | 0                             | 0                              |
| Water                                               | 0                             | 0                             | 0                              |
| <i>B</i> -factors                                   | 91.58                         | 126.34                        | 135.73                         |
| Macromolecule                                       | 91.58                         | 126.34                        | 135.73                         |
| Ligand                                              |                               |                               |                                |
| Water                                               |                               |                               |                                |
| R.m.s. deviations                                   |                               |                               |                                |
| Bond lengths (Å)                                    | 0.003                         | 0.003                         | 0.003                          |
| Bond angles (°)                                     | 0.757                         | 0.739                         | 0.608                          |
| <b>Ramachandran statistics (%)</b>                  |                               |                               |                                |
| Favored                                             | 96.83                         | 97.02                         | 97.89                          |
| Allowed                                             | 3.17                          | 2.98                          | 2.11                           |
| Outliers                                            | 0                             | 0                             | 0                              |

695 \*Values in parentheses are for the last (highest) resolution shell.

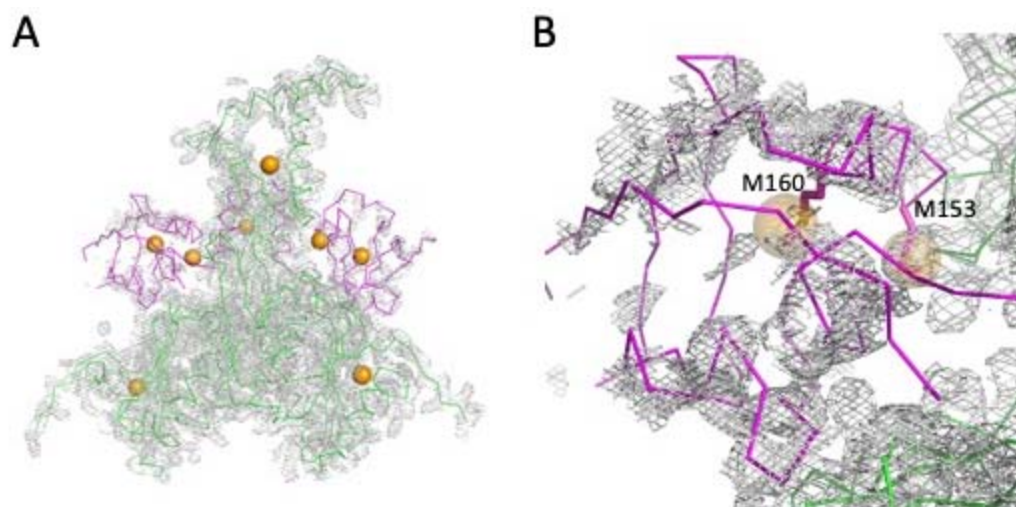

696

697

698 **Supplemental Figure 1.** Se-Met peaks superimposed with PDZ homolog model. (A)

699 The overall electron density map of one asymmetric unit obtained from the Se-

700 derivatized CtpA hexamer crystal. The  $2mF_o-DF_c$  electron density map is rendered at

701  $1\sigma$  threshold and shown as gray meshes. The non-PDZ domains are shown in green

702 and the PDZ domains are shown in magenta. The positions of Se are in orange. (B)

703 Enlarged view of the left PDZ region in (A).

704

705

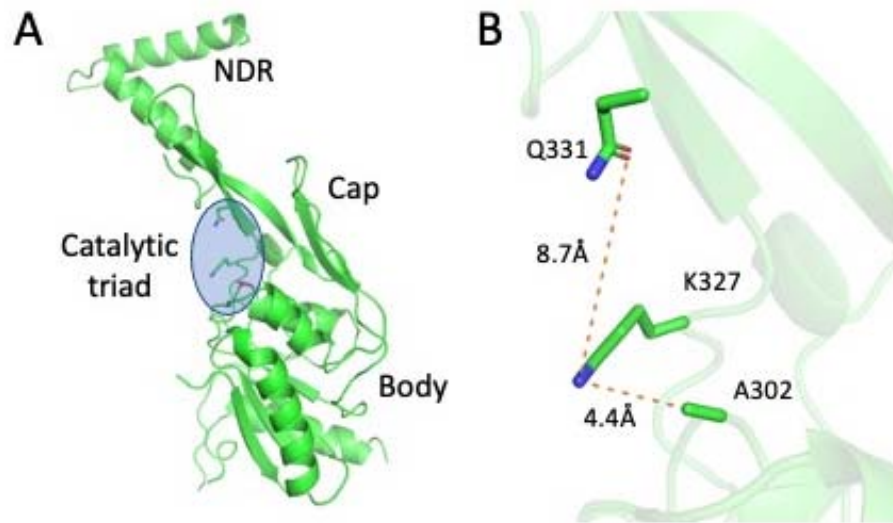

706

707 **Supplemental Figure 2.** Crystal structure of CtpA(S302A) showing only a monomer. (A)

708 overall structure of CtpA(S302A) in ribbons, with the catalytic triad residues in sticks and

709 the point mutation S302A in red sticks. (B) Enlarged view of the catalytic triad in the

710 CtpA(S302A) crystal structure. The structure is also in the inactive configuration.

711

712 **Supplemental Video 1. CtpA hexamer structure.** Rotation of the hexamer, then  
713 transition to a monomer to show the domain structure, then transition to morphing  
714 between inactive and active computational model (based on CtpB).  
715  
716
